# Supplementary material for: Matrix Metalloproteinase 13 Is Associated with Age-Related Choroidal Neovascularization
Source: MDPI journal article supplement (doi:10.3390/antiox12040884), 2023-04-05
Supplement: s1 [file s1]

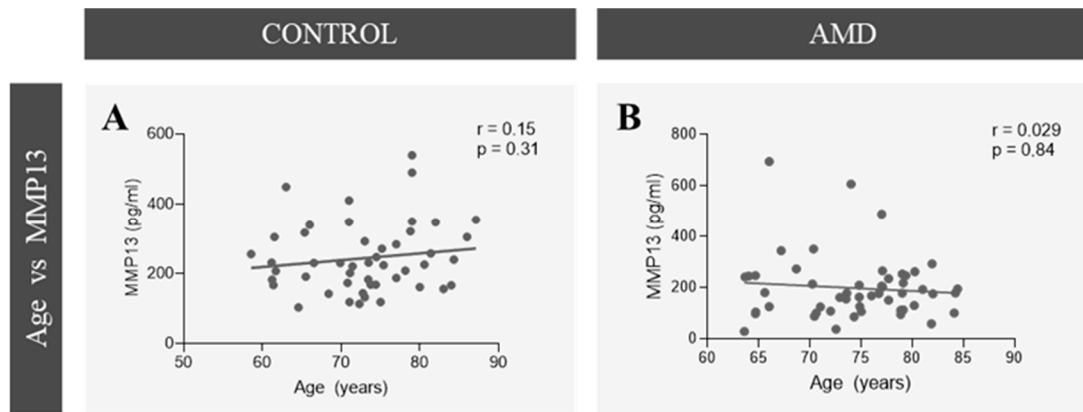

**Figure S1.** Correlation of age with the mean plasma levels of MMP13. No statistically significant correlation was observed in the studied groups (**A**) Correlation in control group. (**B**) Correlation in AMD group. AMD = Age-related macular degeneration, MMP13 = Matrix metalloproteinase 13. The Pearson's  $r$  values are displayed on each graph along with the  $p$  value of statistical significance.
